# Supplementary material
Source: PubMed Central journal article supplement (PMC3175635)

# Supporting Information

## Electronic Properties and $^{13}\text{C}$ NMR Structural Study of $\text{Y}_3\text{N}@C_{88}$

*Wujun Fu, Jianyuan Zhang, Hunter Champion, Tim Fuhrer, Hugo Azuremendi, Tianming Zuo, Jianfei Zhang, Harich, Kim and Harry C. Dorn\**

Department of Chemistry, Virginia Polytechnic Institute and State University, Blacksburg, VA, 24061,  
USA

\* Author to whom correspondence should be addressed; email: [hdorn@vt.edu](mailto:hdorn@vt.edu), Fax: 540-231-3255 Tel: 540-231-5953.

1. **Information for Figure 2: The experimental  $^{13}\text{C}$  NMR shifts of  $\text{Y}_3\text{N}@D_2\text{-C}_{88}$  (22 lines)** in  $\text{CS}_2$  with 10 mg  $\text{Cr}(\text{acac})_3$  relaxant, acetone- $d_6$  lock) after 64,000 scan at 25 °C. The chemical shifts for the 22 lines are at  $\delta$ : 149.36, 148.89, 146.44, 146.21, 145.77, 144.44, 143.92, 143.64, 141.89, 140.07, 139.69 (double intensity), 139.59, 139.10 (double intensity), 138.34, 137.88, 136.14, 135.19, 133.76, 133.65, 132.06, 131.99 ppm. 2. **The computational  $^{13}\text{C}$  NMR chemical shifts of  $\text{Y}_3\text{N}@D_2(35)\text{-C}_{88}$  (22 lines):** 151.66, 147.21, 146.76, 146.24, 144.00, 143.89, 143.18, 142.14, 142.10, 141.66, 141.27, 140.53, 140.02, 139.76, 139.29, 139.27, 137.99, 137.43, 136.25, 135.66, 135.54, 131.94 ppm.

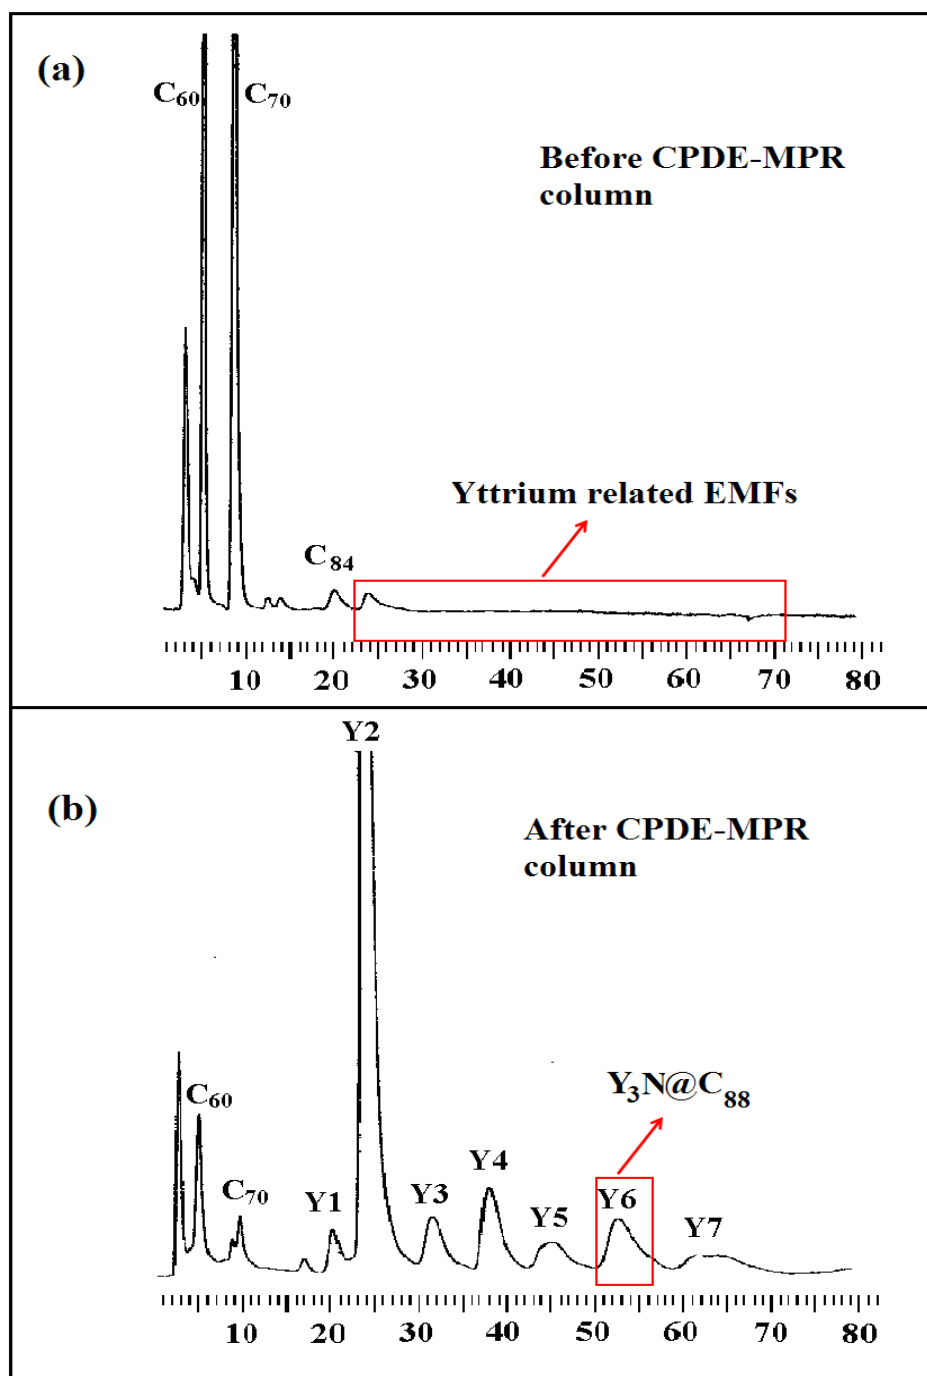

**Figure S1.** (a) HPLC chromatogram of the toluene extract from the raw soot (b) HPLC chromatogram of the eluent from CPDE-MPR column (Both chromatogram on a  $4.6 \times 250$  mm 5PBB column;  $\lambda=390$  nm; flow rate 2.0 mL/min; toluene as eluent; 25 °C)

**Table S1.** The component and yield of each Yttrium fractions

| Fraction | Main component | Yield (mg)* |
|----------|----------------|-------------|
| Y1       | $Y_2@C_{79}N$  | 0.005       |
| Y2       | $Y_3N@C_{80}$  | 2           |
| Y3       | $Y_3N@C_{82}$  | 0.05        |
| Y4       | $Y_3N@C_{84}$  | 0.1         |
| Y5       | $Y_3N@C_{86}$  | 0.01        |
| Y6       | $Y_3N@C_{88}$  | 0.01        |
| Y7       | $Y_2C_{94}$    | 0.01        |

- (the estimated yield is based on “burning” 3, 6 x 1 inch rods. However, 50-100 rods were burned to obtain the sample utilized in this study.)

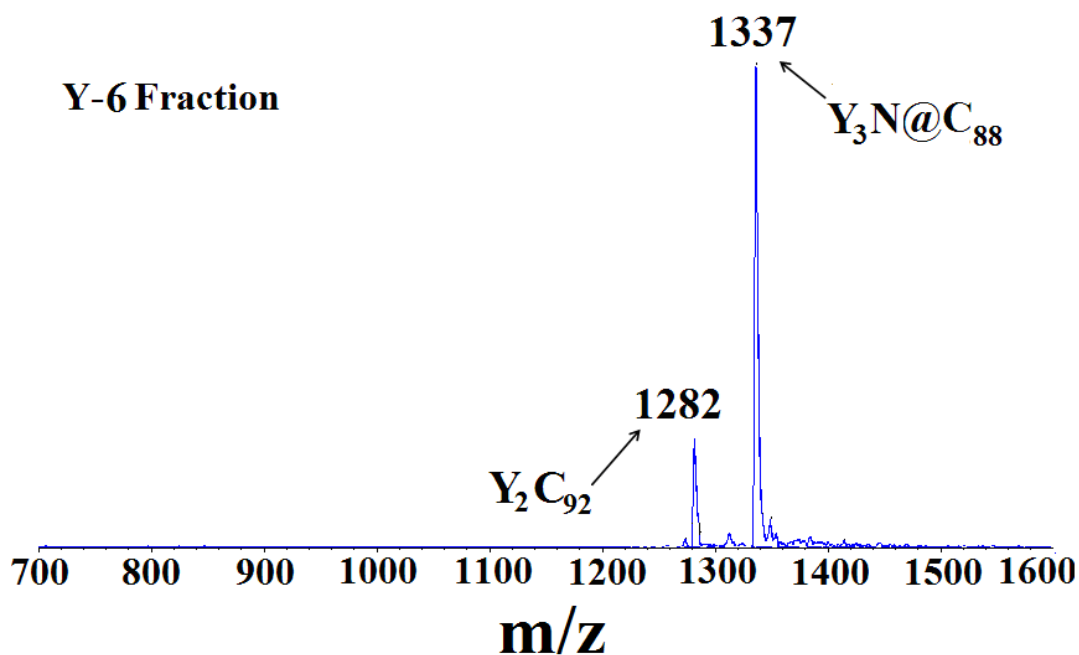

**Figure S2.** The LD-TOF mass spectrum of Y-6 fraction with positive ionization.

**Figure S3.** The LD-TOF mass spectrum of Gd-6 fraction ( $Gd_3N@C_{88}$ ) with positive ionization.

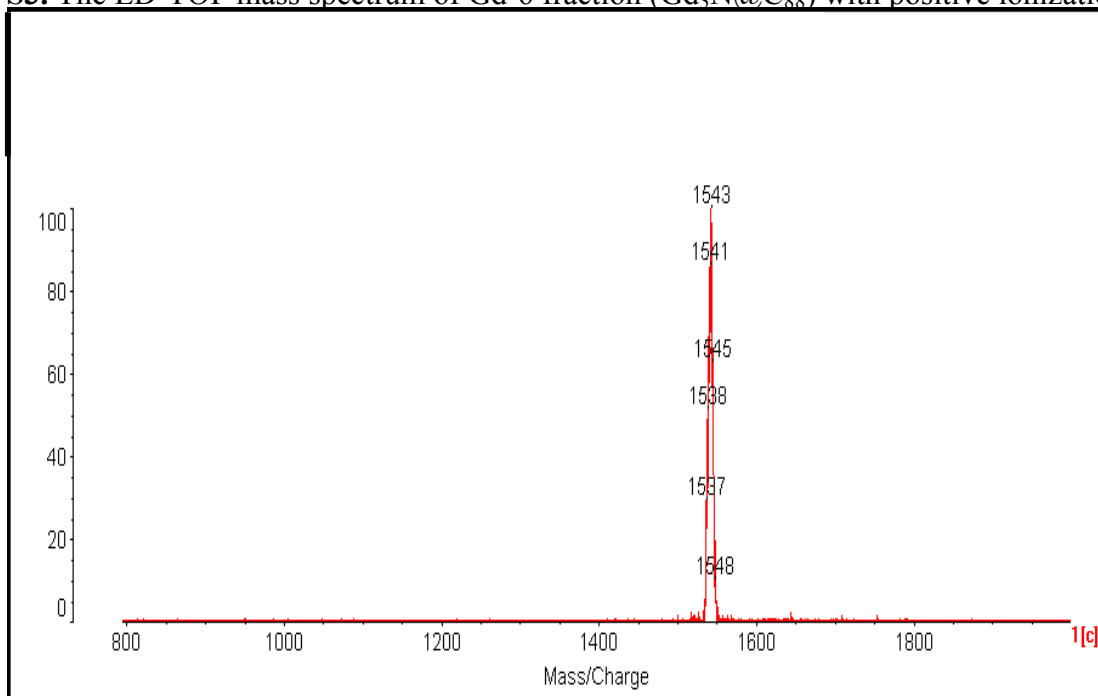

Supplement: NIHMS291044-supplement-1_si_001.pdf [file NIHMS291044-supplement-1_si_001.pdf]
